# Supplementary material for: Serotonin-Derived Fluorophore: A Novel Fluorescent Biomaterial for Copper Detection in Urine
Source: MDPI journal article supplement (doi:10.3390/s23063030), 2023-03-10
Supplement: s1 [file s1]

# Supplementary Materials

## Serotonin-Derived Fluorophore: A Novel Fluorescent Biomaterial for Copper Detection in Urine

Mariagrazia Lettieri <sup>1</sup>, Simona Scarano <sup>1</sup>, Laura Caponi <sup>2</sup>, Andrea Bertolini <sup>3</sup>, Alessandro Saba <sup>2,3</sup>, Pasquale Palladino <sup>1,\*</sup> and Maria Minunni <sup>1,\*</sup>

<sup>1</sup> Department of Chemistry 'Ugo Schiff', University of Florence, 50019 Sesto Fiorentino, Italy

<sup>2</sup> Laboratory of Clinical Pathology, University Hospital of Pisa, 56126 Pisa, Italy

<sup>3</sup> Department of Surgical, Medical and Molecular Pathology and Critical Care Medicine, University of Pisa, 56126 Pisa, Italy

\* Correspondence: pasquale.palladino@unifi.it (P.P.); maria.minunni@unifi.it (M.M.)

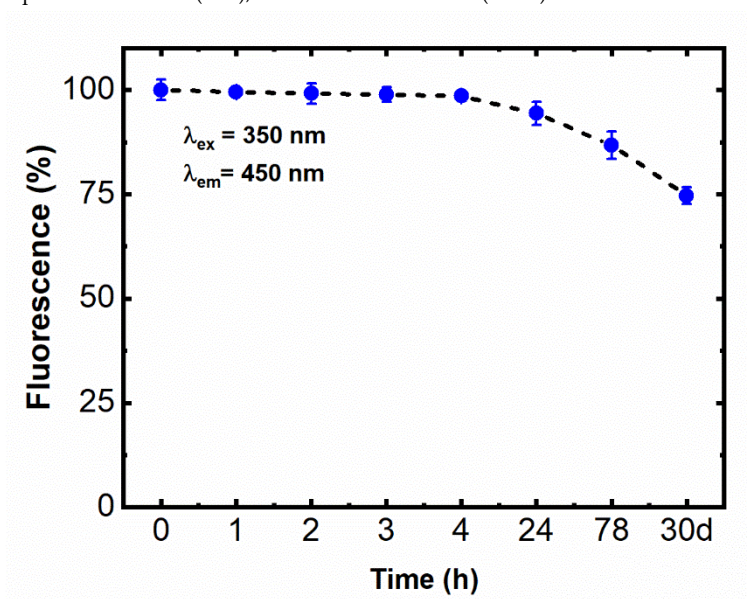

**Figure S1.** Fluorescence stability over time for serotonin-derivative fluorophore (SEDF). SEDF was obtained by heating 2 g L<sup>-1</sup> serotonin at 60 °C for 2 h in 10 mM TRIS at pH 9.00. Fluorescence intensity was recorded at 0, 1, 2, 3, 4, 24, 78 h, and after 30 days (30d). The error bars represent the standard deviation (n = 4).

**Table S1.** Cu<sup>2+</sup> detection in buffer and in AU. Data from **Figure 6**.

| Matrix | Equation       | m (mM)    | LOD (μM)    | LOQ (μM)    | <sup>1</sup> LOD (μg L <sup>-1</sup> ) | <sup>1</sup> LOQ (μg L <sup>-1</sup> ) | R <sup>2</sup> | CV <sub>av</sub> % |
|--------|----------------|-----------|-------------|-------------|----------------------------------------|----------------------------------------|----------------|--------------------|
| Buffer | y = 4.7x + 0.9 | 4.7 ± 0.2 | 0.26 ± 0.01 | 0.85 ± 0.04 | 16.3 ± 0.7                             | 54 ± 2                                 | 0.990          | 4                  |
| AU     | y = 3.4x + 0.9 | 3.4 ± 0.1 | 0.35 ± 0.01 | 1.18 ± 0.05 | 22.6 ± 1.0                             | 75 ± 3                                 | 0.990          | 3                  |

<sup>1</sup> LODs and LOQs are reported in μg L<sup>-1</sup> to compare them to the values of Cu<sup>2+</sup> that determine the pathological state, *i.e.*, 60-240 μg L<sup>-1</sup>.

**Table S2.** Cu<sup>2+</sup> quantification in human urine. Data from **Figure 7**.

| Calibration curve: F <sub>0</sub> /F = 1 + k [Cu <sup>2+</sup> ] |                          |             |             |           |                                        |                                        |                |                    |
|------------------------------------------------------------------|--------------------------|-------------|-------------|-----------|----------------------------------------|----------------------------------------|----------------|--------------------|
| Matrix                                                           | [Cu <sup>2+</sup> ] (mM) | k (mM)      | LOD (μM)    | LOQ (μM)  | <sup>1</sup> LOD (μg L <sup>-1</sup> ) | <sup>1</sup> LOQ (μg L <sup>-1</sup> ) | R <sup>2</sup> | CV <sub>av</sub> % |
| Urine                                                            | 0 - 0.165                | 2.61 ± 0.15 | 0.93 ± 0.05 | 3.1 ± 0.2 | 59 ± 3                                 | 97 ± 11                                | 0.997          | 1                  |
|                                                                  | 0.25 - 0.45              | 1.64 ± 0.14 |             |           |                                        |                                        |                |                    |

<sup>1</sup> LODs and LOQs are reported in μg L<sup>-1</sup> to compare them to the values of Cu<sup>2+</sup> that determine the pathological state, *i.e.*, 60-240 μg L<sup>-1</sup>.

**Table S3.** Physiological Cu<sup>2+</sup> concentration of human urine samples.

| Urine sample | <sup>1</sup> [Cu <sup>2+</sup> ] (nM) |
|--------------|---------------------------------------|
| 1            | 0.31                                  |
| 2            | 0.13                                  |
| 3            | 0.05                                  |
| 4            | 0.08                                  |

<sup>1</sup> [Cu<sup>2+</sup>] was determined via ICP-MS prior of copper addition.

**Table S4.** Fluorescent-based assays for Cu<sup>2+</sup> quantitative analysis in human urine samples.

| Material                    | Fluorescent method | LOD (μg L <sup>-1</sup> ) | LOQ (μg L <sup>-1</sup> ) | Matrix      | References |
|-----------------------------|--------------------|---------------------------|---------------------------|-------------|------------|
| <sup>1</sup> SEDF           | Quenching          | 59 ± 3                    | 97 ± 11                   | Human urine | This work  |
| <sup>2</sup> CDs@COFs       | FRET               | 4.19 × 10 <sup>-4</sup>   | -                         | Human urine | [8]        |
| <sup>3</sup> CS/L-His-SiNPs | Quenching          | 3.49 ± 0.03               | -                         | Human urine | [9]        |

<sup>1</sup> Serotonin-derived fluorophore; <sup>2</sup> Carbon dots (CDs) combined with covalent organic frameworks (COF)s. <sup>3</sup> Chitosan/L-histidine-stabilized silicon nanoparticles (CS/L-His-SiNPs).
